# Supplementary material for: FAM19A4 and hsa-miR124-2 Double Methylation as Screening for ASC-H- and CIN1 HPV-Positive Women
Source: MDPI journal article supplement (doi:10.3390/pathogens13040312), 2024-04-11
Supplement: s1 [file s1]

Supplementary

## FAM19A4 and hsa-miR124-2 double methylation as screening for ASCUS and CIN1 HPV-positive women

Cinzia Peronace<sup>1\*</sup>§, Erika Cione<sup>2\*</sup>, Diana Marisol Abrego-Guandique<sup>3</sup>, Marco De Fazio<sup>1</sup>, Giuseppina Panduri<sup>1</sup>, Maria Cristina Caroleo<sup>3</sup>, Roberto Cannataro<sup>4</sup> and Pasquale Minchella<sup>1</sup>

<sup>1</sup> Unit of Microbiology and Virology, PO Pugliese, AOU Renato Dulbecco, Catanzaro, Italy; §current address Unit of Clinical Microbiology, PO Mater Domini, AOU Renato Dulbecco, Catanzaro, Italy [cinziaperonace@hotmail.it](mailto:cinziaperonace@hotmail.it); [marco\\_2592@yahoo.it](mailto:marco_2592@yahoo.it); [pandurigiuseppina@gmail.com](mailto:pandurigiuseppina@gmail.com); [pminchella@aocz.it](mailto:pminchella@aocz.it)

<sup>2</sup> Department of Pharmacy, Health and Nutritional Sciences, University of Calabria, 87036 Rende (CS), Italy; [erika.cione@unical.it](mailto:erika.cione@unical.it)

<sup>3</sup> Department of Health Sciences, University of Magna Graecia, 88100 Catanzaro, Italy; [dianamarisol.abregoguandique@unicz.it](mailto:dianamarisol.abregoguandique@unicz.it); [mariacristina.caroleo@unicz.it](mailto:mariacristina.caroleo@unicz.it)

<sup>4</sup> Galascreen Laboratories, University of Calabria, 87036 Rende (CS), Italy; [r.cannataro@gmail.com](mailto:r.cannataro@gmail.com)

\* Equally contributed. §Correspondence: [cinziaperonace@hotmail.it](mailto:cinziaperonace@hotmail.it) (CP); [erika.cione@unical.it](mailto:erika.cione@unical.it) (EC).



Abbreviation of hsa-miR-124-2 target gene highlighted in yellow in Figure S1

**ABL1:** ABL Proto-Oncogene 1, Non-Receptor Tyrosine Kinase

**ADCY3:** Adenylate Cyclase 3

**ADCY6:** Adenylate Cyclase 6

**ADCY9:** Adenylate Cyclase 9

**AGTR1:** Angiotensin II Receptor Type 1

**AKT2:** AKT Serine/Threonine Kinase 2

**ARAF:** A-Raf Proto-Oncogene, Serine/Threonine Kinase

**ARHGEF1:** Rho Guanine Nucleotide Exchange Factor 1

**BDKRB1:** Bradykinin Receptor B1

**BIRC2:** Baculoviral IAP Repeat Containing 2

**CASP3:** Caspase 3

**CCNA1:** Cyclin A1

**CDK2:** Cyclin-Dependent Kinase 2

**CDK4:** Cyclin-Dependent Kinase 4

**CDK6:** Cyclin-Dependent Kinase 6

**CDKN1A:** Cyclin-Dependent Kinase Inhibitor 1A

**CDKN2A:** Cyclin-Dependent Kinase Inhibitor 2A

**CEBPA:** CCAAT Enhancer Binding Protein Alpha

**CKS1B:** CDC28 Protein Kinase Regulatory Subunit 1B

**CKS2:** CDC28 Protein Kinase Regulatory Subunit 2

**COL4A1:** Collagen Type IV Alpha 1 Chain

**COL4A4:** Collagen Type IV Alpha 4 Chain

**CTNNB1:** Catenin Beta 1

**CXCL8:** C-X-C Motif Chemokine Ligand 8

**DAPK1:** Death-Associated Protein Kinase 1

**DCC:** DCC Netrin 1 Receptor

**DVL2:** Dishevelled Segment Polarity Protein 2

**E2F1:** E2F Transcription Factor 1

**E2F3:** E2F Transcription Factor 3

**ERBB2:** Erb-B2 Receptor Tyrosine Kinase 2

**ETS1:** ETS Proto-Oncogene 1, Transcription Factor

**FGF1:** Fibroblast Growth Factor 1

**FGF5:** Fibroblast Growth Factor 5

**FGFR1:** Fibroblast Growth Factor Receptor 1

**FN1:** Fibronectin 1

**GNA12:** G Protein Subunit Alpha 12

**GNA13:** G Protein Subunit Alpha 13

**GNAI1:** G Protein Subunit Alpha I1

**GNAI2:** G Protein Subunit Alpha I2

**GNAI3:** G Protein Subunit Alpha I3

**GNB4:** G Protein Subunit Beta 4

**GNG10:** G Protein Subunit Gamma 10  
**GRB2:** Growth Factor Receptor-Bound Protein 2  
**IGF1R:** Insulin-Like Growth Factor 1 Receptor  
**IL6:** Interleukin 6  
**ITGA3:** Integrin Subunit Alpha 3  
**ITGB1:** Integrin Subunit Beta 1  
**JUP:** Junction Plakoglobin  
**LAMA1:** Laminin Subunit Alpha 1  
**LAMA4:** Laminin Subunit Alpha 4  
**LAMB3:** Laminin Subunit Beta 3  
**LAMC1:** Laminin Subunit Gamma 1  
**MAPK1:** Mitogen-Activated Protein Kinase 1  
**MDM2:** MDM2 Proto-Oncogene  
**MET:** Mesenchymal-Epithelial Transition Factor  
**MMP2:** Matrix Metalloproteinase 2  
**MMP9:** Matrix Metalloproteinase 9  
**MSH6:** MutS Homolog 6  
**NFKB1:** Nuclear Factor Kappa B Subunit 1  
**NRAS:** NRAS Proto-Oncogene, GTPase  
**PDGFA:** Platelet-Derived Growth Factor Subunit A  
**PLCB1:** Phospholipase C Beta 1  
**PTGS2:** Prostaglandin-Endoperoxide Synthase 2  
**RAC1:** Ras-Related C3 Botulinum Toxin Substrate 1  
**RAD51:** RAD51 Recombinase  
**RALGDS:** Ral Guanine Nucleotide Dissociation Stimulator  
**RASSF1:** Ras Association Domain Family Member 1  
**RELA:** RELA Proto-Oncogene, NF-KB Subunit  
**RHOA:** Ras Homolog Family Member A  
**ROCK1:** Rho-Associated Coiled-Coil Containing Protein Kinase 1  
**ROCK2:** Rho-Associated Coiled-Coil Containing Protein Kinase 2  
**RUNX1T1:** RUNX1 Partner Transcriptional Co-Repressor 1  
**SOS2:** Ras/Rho Guanine Nucleotide Exchange Factor 2  
**STAT3:** Signal Transducer and Activator of Transcription 3  
**STAT5A:** Signal Transducer and Activator of Transcription 5A  
**STK36:** Serine/Threonine Kinase 36  
**TGFBR1:** Transforming Growth Factor Beta Receptor 1  
**WNT5B:** Wingless-Type MMTV Integration Site Family, Member 5B  
**XIAP:** X-Linked Inhibitor of Apoptosis
